# Supplementary material for: Photoswitchable Cu(ii)/Cu(i) catalyses assisted by enzyme-like non-covalent interactions in Cu(ii)–melamine coordination polymers for installing CO2/CS2 and CF3 groups in heterocycles
Source: Royal Society of Chemistry journal article supplement (doi:10.1039/d0nj02154g), 2020-01-01
Supplement: d0nj02154g1.pdf [file d0nj02154g1.pdf]

Electronic Supplementary Material (ESI) for New Journal of Chemistry.  
Electronic Supplementary Information (ESI)

# Photoswitchable Cu(II)/Cu(I) catalyses assisted by enzyme-like non-covalent interactions in Cu(II)-melamine coordination polymer for installing CO<sub>2</sub>/CS<sub>2</sub> and CF<sub>3</sub> groups in heterocycles

Tiexin Zhang,<sup>\*a</sup> Hanbin Zang,<sup>a</sup> Fangyuan Gai,<sup>b</sup> Zhi Feng,<sup>a</sup> Mochen Li<sup>a</sup> and Chunying Duan<sup>\*ac</sup>

<sup>a</sup> State Key Laboratory of Fine Chemicals, Dalian University of Technology, Dalian, 116024, P. R. China

<sup>b</sup> Advanced Institute of Materials Science, School of Chemistry and biology, Changchun University of Technology, Changchun, 130012, P. R. China.

<sup>c</sup> Collaborative Innovation Center of Chemical Science and Engineering, Tianjin 300071, China

E-mail: zhangtiexin@dlut.edu.cn; cyduan@dlut.edu.cn;

Fax: +86-411-84986476; Tel: +86-411-84986476

| Supplementary Contents                                                                       | Page  |
|----------------------------------------------------------------------------------------------|-------|
| <b>Section I: Synthesis of H<sub>6</sub>TDPAT, Cu–TDPAT and Zn–TDPAT</b>                     | 1     |
| <b>Synthesis of H<sub>6</sub>TDPAT</b>                                                       | 1     |
| <b>Fig. S1.</b> Diagram of ligand synthesis                                                  | 1     |
| <b>Synthesis and Activation of Cu–TDPAT</b>                                                  | 1     |
| <b>Synthesis and Activation of Zn–TDPAT</b>                                                  | 1     |
| <b>Section II: Supplementary Figure</b>                                                      | 2     |
| <b>Fig. S2.</b> The UV-vis and fluorescence spectra of H <sub>6</sub> TDPAT in DMSO solution | 2     |
| <b>Fig. S3.</b> <sup>19</sup> F NMR spectra of TEMPO-CF <sub>3</sub>                         | 2     |
| <b>Fig. S4.</b> IR spectra of Zn–TDPAT (red) vs CS <sub>2</sub> @Zn–TDPAT                    | 3     |
| <b>Fig. S5.</b> SEM images of Cu–TDPAT before and after photocatalysis                       | 3     |
| <b>Section III: NMR Data of the Products</b>                                                 | 4~5   |
| <b>2a, 2b, 2c, 2d</b>                                                                        | 4     |
| <b>2e, 2f, 2g, 3a</b>                                                                        | 5     |
| <b>Section IV: NMR Spectra of the Products</b>                                               | 6~17  |
| <b>2a</b>                                                                                    | 6~7   |
| <b>2b</b>                                                                                    | 7~8   |
| <b>2c</b>                                                                                    | 9~10  |
| <b>2d</b>                                                                                    | 10~11 |
| <b>2e</b>                                                                                    | 12~13 |
| <b>2f</b>                                                                                    | 13~14 |
| <b>2g</b>                                                                                    | 15~16 |
| <b>3a</b>                                                                                    | 16~17 |
| <b>Notes and references</b>                                                                  | 17    |

## Section I. Synthesis of H<sub>6</sub>TDPAT, Cu–TDPAT and Zn–TDPAT:

### Synthesis of 2,4,6-tris(3,5-dicarboxylphenylamino)-1,3,5-triazine (H<sub>6</sub>TDPAT):

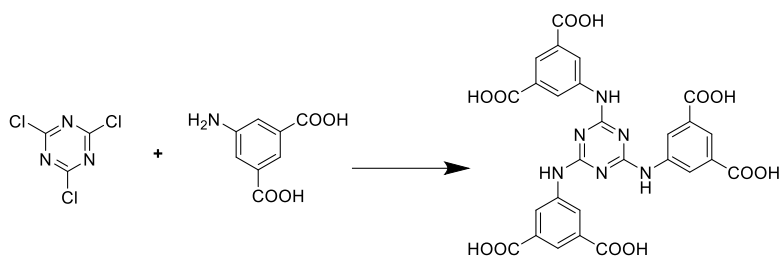

Fig. S1. Diagram of ligand synthesis

H<sub>6</sub>TDPAT was synthesized according to the literature with some modification.<sup>1,2,3</sup> NaOH (2.68 g, 0.067 mol), and NaHCO<sub>3</sub> (4.37 g, 0.052 mol) were added to 50 mL H<sub>2</sub>O. When the system was cooled to room temperature, the 5-aminoisophthalic acid (7.60 g, 0.042 mol) was added into the mixture, and then the mixture was stirred at 0 °C for 45 mins. After that, the cyanuric chloride (1.84 g, 0.01 mol), which was suspended in 1,4-dioxane (35 mL), was added dropwise, then the mixture was heated at 100 °C for 24h. After cooling down to room temperature, concentrated HCl (aq.) was added into the reaction mixture to adjust pH to 2. The precipitated solid was collected by filtration, and then washed with distilled water for three times and hot methanol for three times successively, and then dried to give pure product H<sub>6</sub>TDPAT (5.49 g, 95%). <sup>1</sup>H-NMR (*d*<sup>6</sup>-DMSO, 400 MHz):  $\delta$  12.84 (br s, 6H), 9.68 (s, 3H), 8.48 (s, 6H), 8.13 (s, 3H). The NMR data were in accordance with the literature.<sup>2</sup>

### Synthesis and Activation of Cu–TDPAT:

[Cu<sub>3</sub>(TDPAT)(H<sub>2</sub>O)<sub>3</sub>] $\cdot$ 10H<sub>2</sub>O $\cdot$ 5DMA: the batch preparation of Cu–TDPAT was in accordance with the literature protocol.<sup>2</sup> 0.6 g (0.98 mmol) of H<sub>6</sub>TDPAT was dissolved in the mixture of 20 mL of DMA, 20 mL of DMSO and 2 mL of H<sub>2</sub>O. Then, 3.28 g (13.6 mmol) of Cu(NO<sub>3</sub>)<sub>2</sub> $\cdot$ 3H<sub>2</sub>O and 18 mL of HBF<sub>4</sub> were successively added into the solution. The mixture was sonicated until it became homogeneous, and then equally divided into 20 portions, sealed in vials, and heated at 85 °C for 3 days. After cooling down to room temperature, blue crystals were collected (0.895 g, 62% yield, calculated based upon ligand).

The sample of Cu–TDPAT was activated according to the literature with some modification.<sup>2</sup> The crystals were washed with methanol three times to remove impurity on surface, then soaked in methanol three days to remove the non-volatile solvents in pores, the fresh methanol was changed every 12 hrs. Following, the crystals were treated with supercritical carbon dioxide, and the sample was then subjected to vacuum heating at 75 °C for 6 hrs. After cooling down, the activated sample of Cu–TDPAT was stored in the predried and N<sub>2</sub>-filled Schlenk tube away from light.

### Synthesis and Activation of Zn–TDPAT:

Zn<sub>3</sub>(TDPAT)(H<sub>2</sub>O) $\cdot$ 3.125H<sub>2</sub>O $\cdot$ 4DMF: the batch preparation of Zn–TDPAT was in accordance with the literature protocol.<sup>3</sup> 0.76 g (1.22 mmol) of H<sub>6</sub>TDPAT was dissolved in the mixture of 80 mL of DMF, 40 mL of ethylene glycol and 10 mL of H<sub>2</sub>O. Then, 1.58 g (5.32 mmol) of Zn(NO<sub>3</sub>)<sub>2</sub> $\cdot$ 6H<sub>2</sub>O and 10 mL of HNO<sub>3</sub> (3.5 mol/L in DMF) were successively added into the solution. The mixture was sonicated until it became homogeneous, and then equally divided into 20 portions, sealed in vials, and heated at 80 °C for 3 days. After cooling down to room temperature, purple crystals were collected (0.65 g, 44% yield, calculated based upon ligand).

The crystals were washed with DMF three times to remove impurity on surface, and washed with methanol to remove the residual DMF, then soaked in methanol three days to remove the non-volatile solvents in pores, the fresh methanol was changed every 12 hrs. Following, the crystals were treated with supercritical carbon dioxide, and the sample was then subjected to vacuum at 25 °C for 6 hrs. After cooling down, the activated sample of Zn–TDPAT was stored in the predried and N<sub>2</sub>-filled Schlenk tube away from light.

Section II Supplementary Figure.

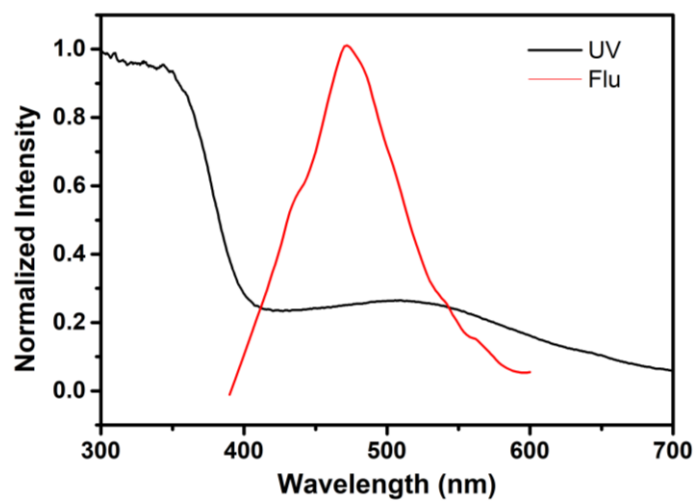

Fig. S2. The UV-vis (black line) and fluorescence (red line) spectra of H<sub>6</sub>TDPAT in DMSO solution. Irradiated at 328 nm

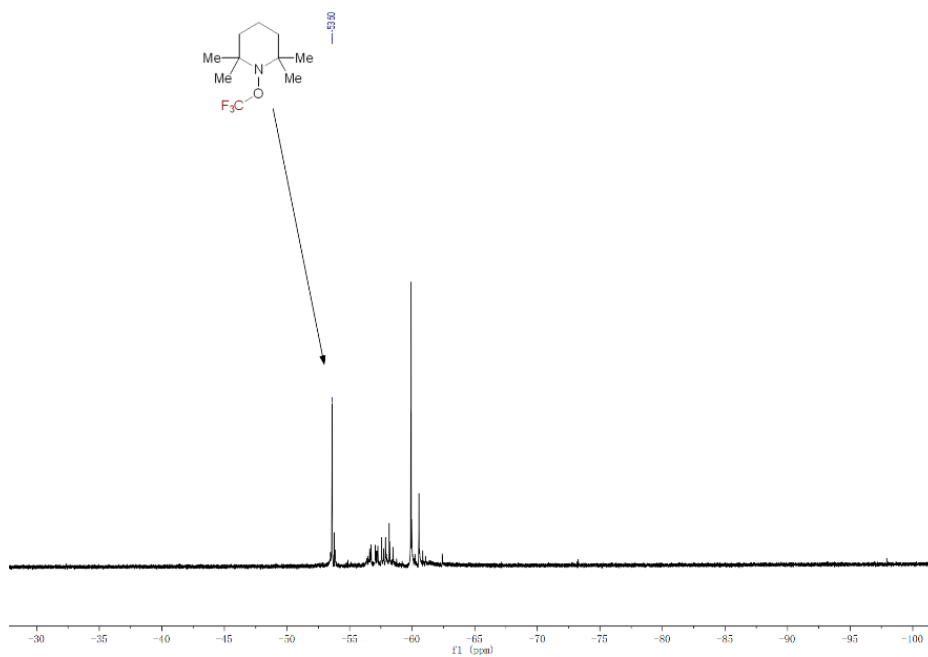

Fig. S3. <sup>19</sup>F NMR spectra of TEMPO-CF<sub>3</sub>

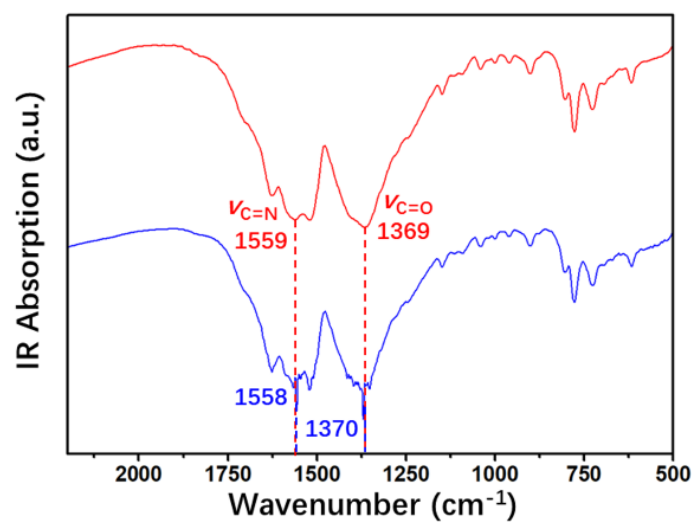

**Fig. S4.** Comparison of the IR spectra of Zn-TDPAT (red) and Zn-TDPAT encapsulated with  $\text{CS}_2$  (blue).

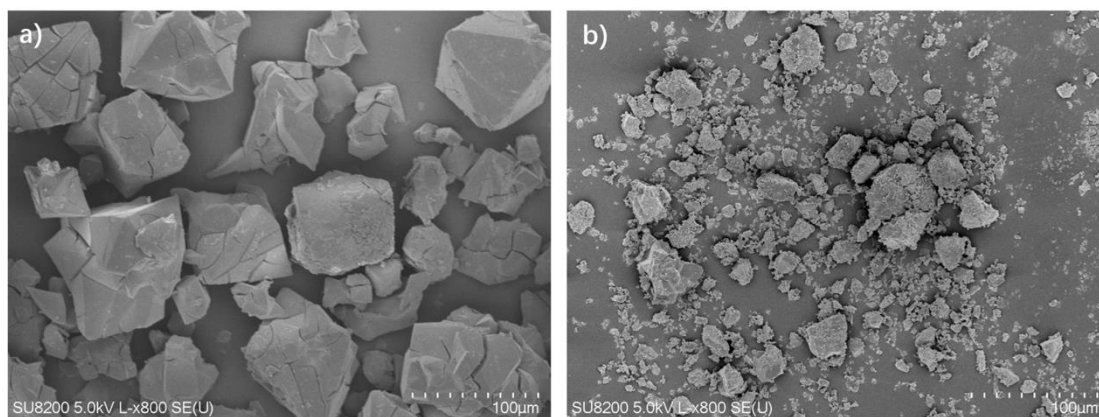

**Fig. S5.** Comparison of the scanning electron microscope (SEM) images of Cu-TDPAT before (a) and after (b) photocatalysis.

### Section III NMR Data of the Products.

#### 3-Benzyl-5-phenyl-5-(2,2,2-trifluoroethyl)oxazolidin-2-one (**2a**)

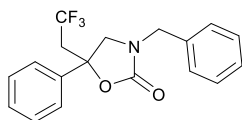

This compound was synthesized according to the general procedure (GP) and isolated by flash chromatography as colorless sticky oil (*ca.* 64.6 mg, 77%) using petroleum ether/ethyl acetate (v:v 10:1~7:1) as the gradient eluent system. Known compound.<sup>4</sup> **<sup>1</sup>H NMR** (500 MHz, CDCl<sub>3</sub>)  $\delta$  7.43-7.28 (m, 8H), 7.20 (d, *J* = 7.5 Hz, 2H), 4.44 (dd, *J* = 47.3, 14.9 Hz, 2H), 3.68 (dd, *J* = 58.9, 9.1 Hz, 2H), 2.79 (qd, *J* = 10.1, 2.8 Hz, 2H). **<sup>13</sup>C NMR** (126 MHz, CDCl<sub>3</sub>)  $\delta$  156.3, 140.9, 135.1, 128.9, 128.9, 128.7, 128.14, 128.07, 124.4 (q, *J* = 278.4 Hz), 124.3, 78.1 (q, *J* = 2.2 Hz), 55.2 (q, *J* = 1.5 Hz), 48.3, 44.4 (q, *J* = 27.8 Hz). **<sup>19</sup>F NMR** (470 MHz, CDCl<sub>3</sub>)  $\delta$  -60.56 (t, *J* = 10.1 Hz, 3F).

#### 3-Benzyl-5-(4-bromophenyl)-5-(2,2,2-trifluoroethyl)oxazolidin-2-one (**2b**)

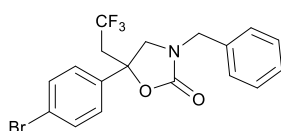

This compound was synthesized according to the general procedure (GP) and isolated by flash chromatography as yellow sticky oil (*ca.* 76.5 mg, 74%) using petroleum ether/ethyl acetate (v:v 7:1~5:1) as the gradient eluent system. Known compound.<sup>4</sup> **<sup>1</sup>H NMR** (500 MHz, CDCl<sub>3</sub>)  $\delta$  7.55-7.49 (m, 2H), 7.36-7.29 (m, 3H), 7.27-7.16 (m, 4H), 4.43 (dd, *J* = 37.9, 14.9 Hz, 2H), 3.64 (dd, *J* = 67.8, 9.2 Hz, 2H), 2.77 (q, *J* = 10.0 Hz, 2H). **<sup>13</sup>C NMR** (126 MHz, CDCl<sub>3</sub>)  $\delta$  156.0, 139.8, 134.9, 132.1, 129.0, 128.3, 128.1, 125.2, 124.3 (q, *J* = 276.7 Hz), 122.9, 77.7 (q, *J* = 2.1 Hz), 55.0, 48.3, 44.3 (q, *J* = 28.0 Hz). **<sup>19</sup>F NMR** (470 MHz, CDCl<sub>3</sub>)  $\delta$  -60.46 (t, *J* = 10.0 Hz, 3F).

#### 3-Benzyl-5-(4-chlorophenyl)-5-(2,2,2-trifluoroethyl)oxazolidin-2-one (**2c**)

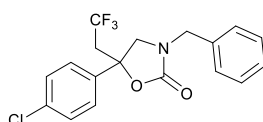

This compound was synthesized according to the general procedure (GP) and isolated by flash chromatography as colorless sticky oil (*ca.* 66.5 mg, 72%) using petroleum ether/ethyl acetate (v:v 7:1~5:1) as the gradient eluent system. Known compound.<sup>4</sup> **<sup>1</sup>H NMR** (500 MHz, CDCl<sub>3</sub>)  $\delta$  7.39-7.27 (m, 7H), 7.22-7.17 (m, 2H), 4.43 (dd, *J* = 44.7, 14.9 Hz, 2H), 3.64 (dd, *J* = 82.8, 9.2 Hz, 2H), 2.77 (q, *J* = 10.0 Hz, 2H). **<sup>13</sup>C NMR** (126 MHz, CDCl<sub>3</sub>)  $\delta$  156.0, 139.2, 134.9, 134.8, 129.1, 128.9, 128.3, 128.1, 125.9, 124.3 (q, *J* = 278.3 Hz), 77.7 (q, *J* = 2.2 Hz), 55.1 (d, *J* = 1.4 Hz), 48.3, 44.4 (q, *J* = 27.8 Hz). **<sup>19</sup>F NMR** (470 MHz, CDCl<sub>3</sub>)  $\delta$  -60.48 (t, *J* = 10.0 Hz, 3F).

#### 3-Benzyl-5-(*p*-tolyl)-5-(2,2,2-trifluoroethyl)oxazolidin-2-one (**2d**)

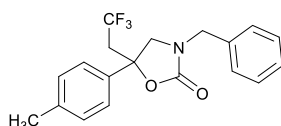

This compound was synthesized according to the general procedure (GP) and isolated by flash chromatography as colorless sticky oil (*ca.* 53.3 mg, 61%) using petroleum ether/ethyl acetate (v:v 5:1) as the eluent system. Known compound.<sup>4</sup> **<sup>1</sup>H NMR** (500 MHz, CDCl<sub>3</sub>)  $\delta$  7.35-7.28 (m, 3H), 7.25-7.16 (m, 6H), 4.43 (dd, *J* = 48.7, 14.9 Hz, 2H), 3.66 (dd, *J* = 55.3, 9.1 Hz, 2H), 2.77 (qd, *J* = 10.1, 2.8 Hz, 2H), 2.35 (s, 3H). **<sup>13</sup>C NMR** (126 MHz, CDCl<sub>3</sub>)  $\delta$  156.4, 138.5, 137.9, 135.1, 129.5, 128.90, 128.12, 128.08, 124.5 (q, *J* = 278.4 Hz), 124.2, 78.1 (q, *J* = 2.1 Hz), 55.0, 48.3, 44.4 (q, *J* = 27.6 Hz), 21.1. **<sup>19</sup>F NMR** (470 MHz, CDCl<sub>3</sub>)  $\delta$  -60.57 (t, *J* = 10.1 Hz, 3F).

3-Benzyl-5-(naphthalen-2-yl)-5-(2,2,2-trifluoroethyl)oxazolidin-2-one (**2e**)

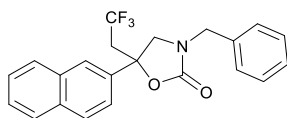

This compound was synthesized according to the general procedure (GP) and isolated by flash chromatography as colorless sticky oil (*ca.* 57.8 mg, 60%) using petroleum ether/ethyl acetate (v:v 7:1~5:1) as the gradient eluent system. Known compound.<sup>4</sup> **<sup>1</sup>H NMR** (500 MHz, CDCl<sub>3</sub>)  $\delta$  7.92 (s, 1H), 7.86 (dd, *J* = 11.9, 7.2 Hz, 3H), 7.56–7.50 (m, 2H), 7.36–7.18 (m, 6H), 4.45 (dd, *J* = 65.1, 15.0 Hz, 2H), 3.76 (dd, *J* = 61.4, 9.2 Hz, 2H), 2.95 – 2.83 (m, 2H). **<sup>13</sup>C NMR** (126 MHz, CDCl<sub>3</sub>)  $\delta$  156.4, 137.9, 135.0, 133.0, 132.9, 129.1, 128.9, 128.4, 128.2, 128.1, 127.7, 126.9, 124.5 (q, *J* = 278.5 Hz), 123.6, 121.7, 78.2 (q, *J* = 2.1 Hz), 55.0, 48.4, 44.3 (q, *J* = 27.9 Hz). **<sup>19</sup>F NMR** (470 MHz, CDCl<sub>3</sub>)  $\delta$  -60.51 (t, *J* = 10.1 Hz, 3F).

3-Butyl-5-phenyl-5-(2,2,2-trifluoroethyl)oxazolidin-2-one (**2f**)

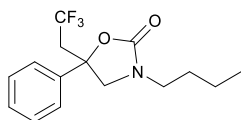

This compound was synthesized according to the general procedure (GP) and isolated by flash chromatography as colorless oil (*ca.* 56.5 mg, 75%) using petroleum ether/ethyl acetate (v:v 7:1~5:1) as the gradient eluent system. Known compound.<sup>4</sup> **<sup>1</sup>H NMR** (500 MHz, CDCl<sub>3</sub>)  $\delta$  7.45–7.34 (m, 5H), 3.84 (dd, *J* = 79.0, 9.0 Hz, 2H), 3.26 (dtd, *J* = 21.4, 14.0, 7.5 Hz, 2H), 2.83 (qd, *J* = 10.1, 2.4 Hz, 2H), 1.55–1.45 (m, 2H), 1.33–1.27 (m, 2H), 0.91 (t, *J* = 7.3 Hz, 3H). **<sup>13</sup>C NMR** (126 MHz, CDCl<sub>3</sub>)  $\delta$  156.2, 141.2, 128.9, 128.6, 124.5 (q, *J* = 278.5 Hz), 124.3, 77.8 (q, *J* = 2.2 Hz), 55.6 (d, *J* = 1.5 Hz), 44.5 (q, *J* = 27.7 Hz), 43.9, 29.3, 19.8, 13.7. **<sup>19</sup>F NMR** (470 MHz, CDCl<sub>3</sub>)  $\delta$  -60.59 (t, *J* = 10.1 Hz, 3F).

3'-Benzyl-2-(trifluoromethyl)-3,4-dihydro-2*H*-spiro[naphthalene-1,5'-oxazolidin]2'-one (**2g**)

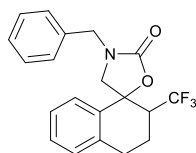

This compound was synthesized according to the general procedure (GP) and isolated by flash chromatography as colorless sticky oil (*ca.* 57.8 mg, 64%) using petroleum ether/ethyl acetate (v:v 5:1~4:1) as the gradient eluent system. Known compound.<sup>4</sup> **<sup>1</sup>H NMR** (500 MHz, CDCl<sub>3</sub>)  $\delta$  7.36–7.23 (m, 8H), 7.10–7.06 (m, 1H), 4.51 (dd, *J* = 42.0, 14.8 Hz, 2H), 3.84 (d, *J* = 9.7 Hz, 1H), 3.32 (d, *J* = 9.7 Hz, 1H), 2.99 – 2.81 (m, 3H), 2.28–2.21 (m, 1H), 1.84–1.71 (m, 1H). **<sup>13</sup>C NMR** (126 MHz, CDCl<sub>3</sub>)  $\delta$  155.9, 137.6, 134.2, 133.5, 127.8, 127.7, 127.5, 127.3, 127.1, 125.5, 124.3, 124.2 (q, *J* = 288.7 Hz), 76.0, 52.4 (q, *J* = 1.9 Hz), 47.5, 45.4 (q, *J* = 25.5 Hz), 28.7, 19.1 (d, *J* = 2.2 Hz). **<sup>19</sup>F NMR** (470 MHz, CDCl<sub>3</sub>)  $\delta$  -66.38 (d, *J* = 8.9 Hz, 3F).

3-Benzyl-5-phenyl-5-(2,2,2-trifluoroethyl)thiazolidine-2-thione (**3a**)

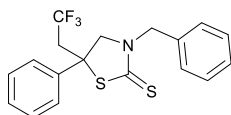

This compound was synthesized according to the general procedure (GP) using CS<sub>2</sub> instead of CO<sub>2</sub>, and isolated by flash chromatography as yellow sticky oil (*ca.* 49.6 mg, 54%) using petroleum ether/ethyl acetate (v:v 4:1~3:1) as the gradient eluent system. **<sup>1</sup>H NMR** (500 MHz, CDCl<sub>3</sub>)  $\delta$  7.35–7.27 (m, 8H), 7.18–7.16 (m, 2H), 5.02 (dd, *J* = 36.1, 14.5 Hz, 2H), 4.23 (dd, *J* = 48.9, 11.9 Hz, 2H), 2.95 (qd, *J* = 10.0, 3.6 Hz, 2H). **<sup>13</sup>C NMR** (126 MHz, CDCl<sub>3</sub>)  $\delta$  194.1, 137.0, 133.6, 128.0, 127.9, 127.5 (overlapped), 127.4, 126.8 (q, *J* = 275.6 Hz), 125.0, 63.0 (d, *J* = 1.8 Hz), 53.9 (q, *J* = 1.7 Hz), 51.7, 43.5 (q, *J* = 27.5 Hz). **<sup>19</sup>F NMR** (470 MHz, CDCl<sub>3</sub>)  $\delta$  -60.73 (t, *J* = 10.1 Hz, 3F). HRMS (ESI<sup>+</sup>): calcd for C<sub>18</sub>H<sub>17</sub>F<sub>3</sub>NS<sub>2</sub><sup>+</sup> [M+H]<sup>+</sup> 368.0749, found 368.0741.

## Section IV NMR Spectra of the Products.

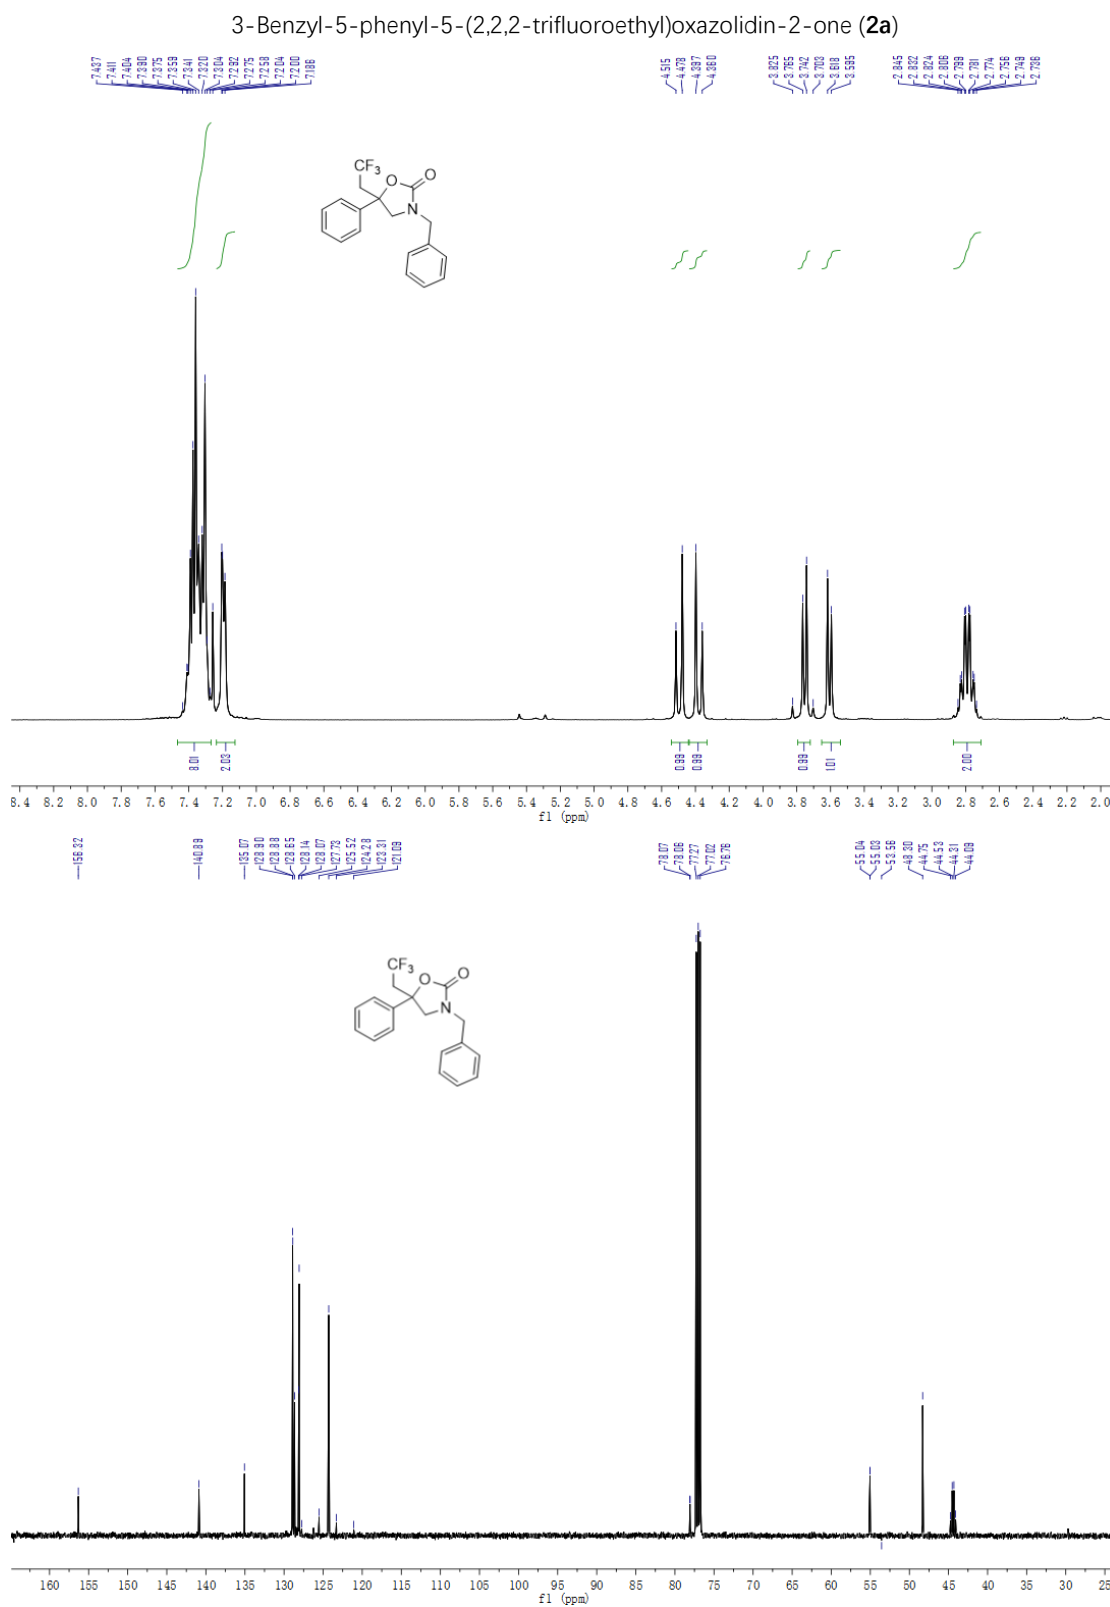

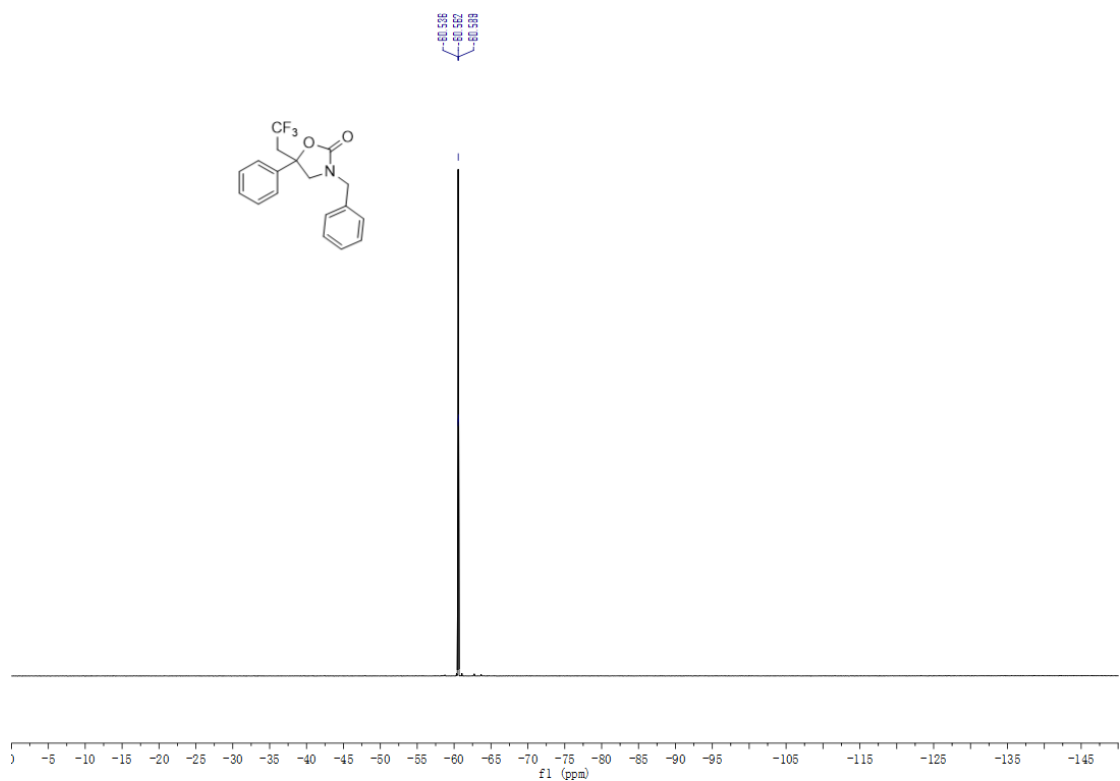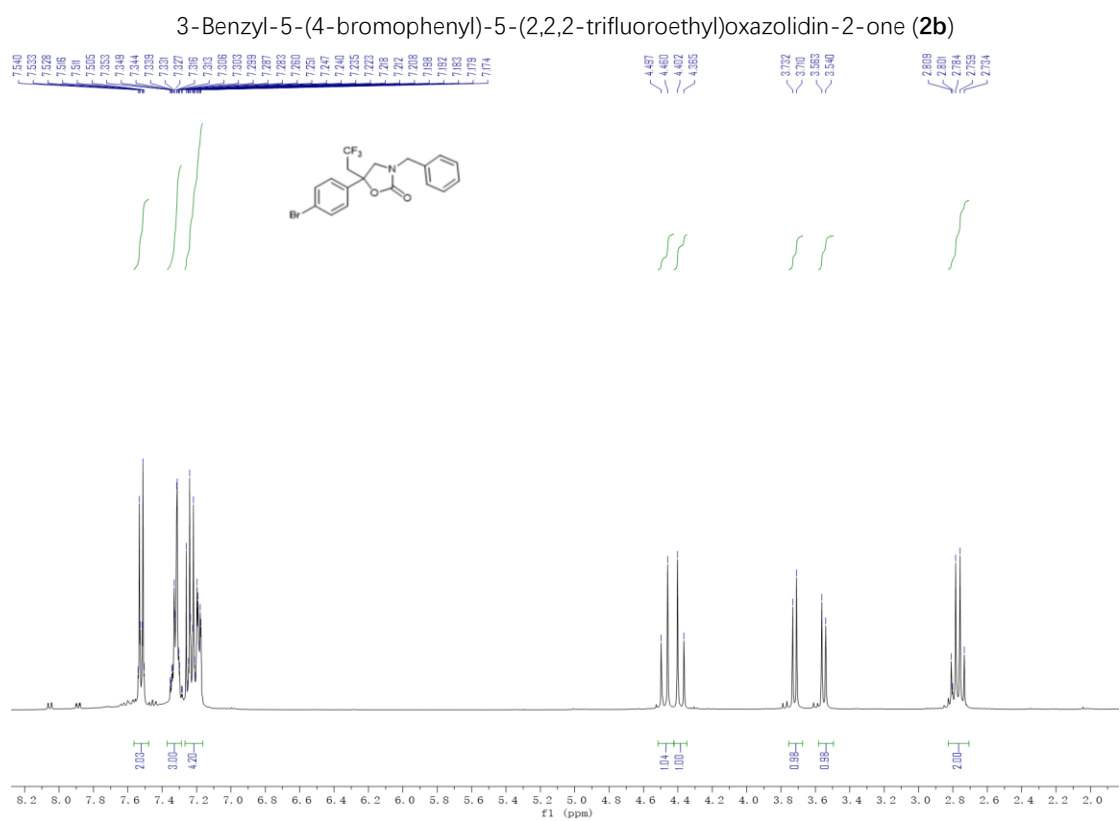

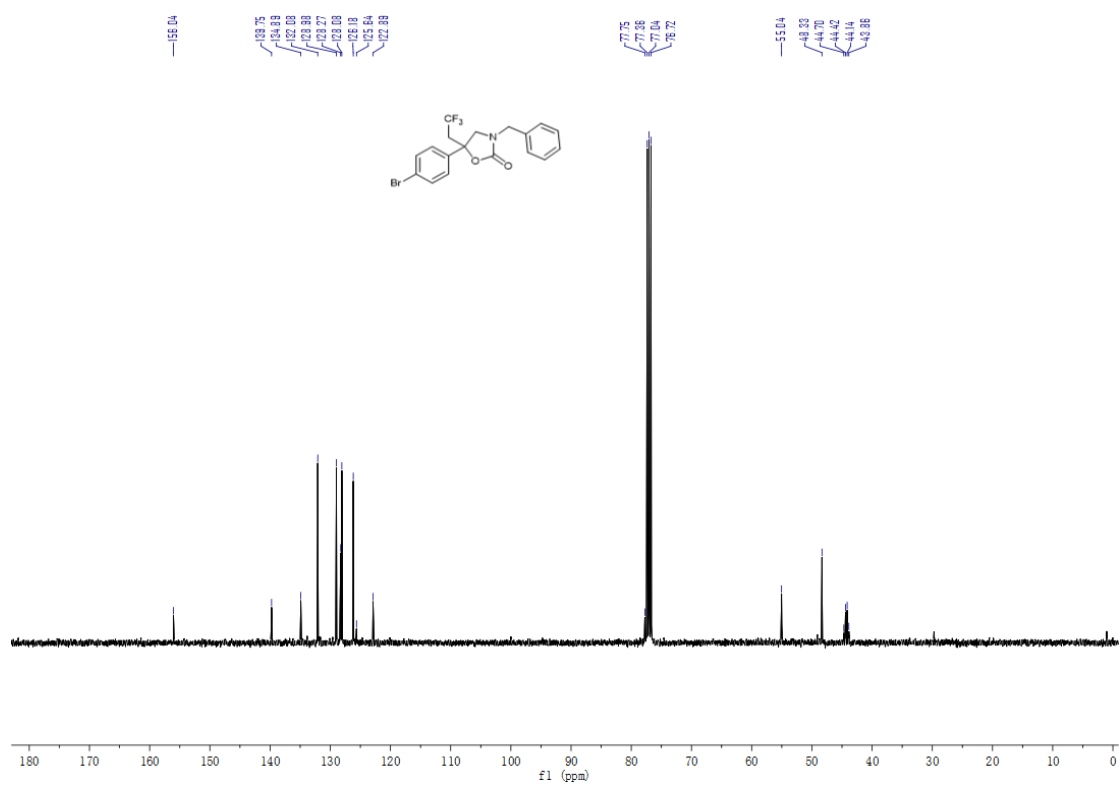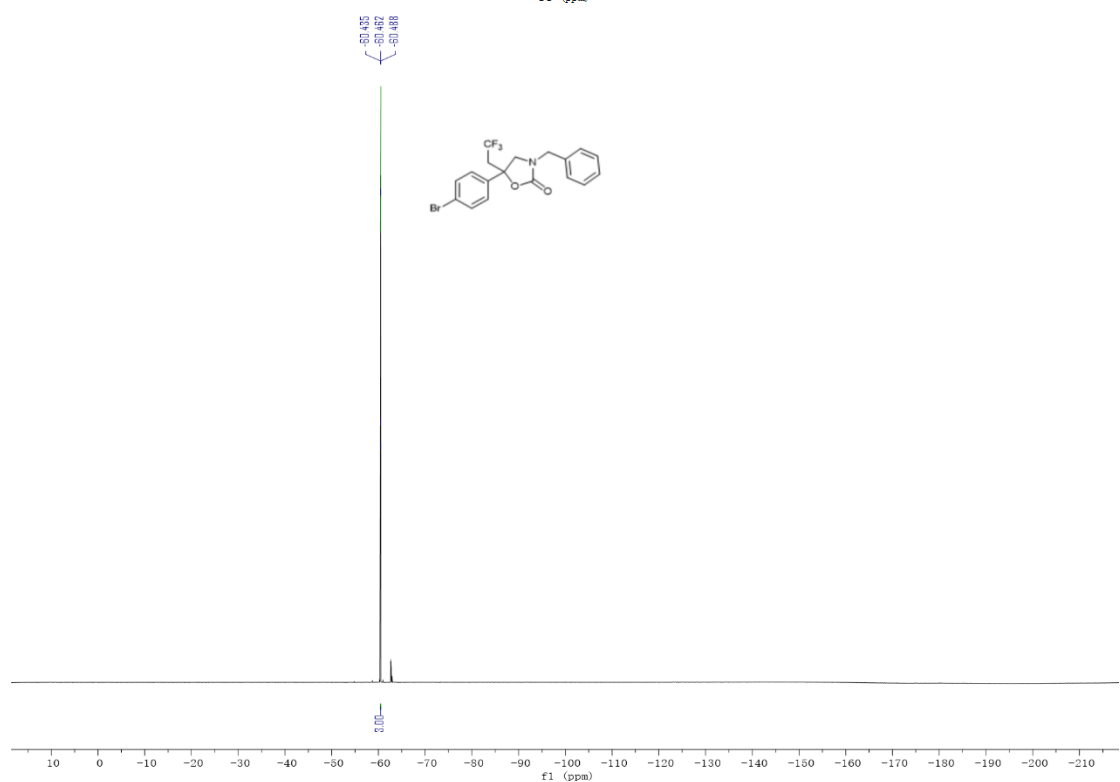

3-Benzyl-5-(4-chlorophenyl)-5-(2,2,2-trifluoroethyl)oxazolidin-2-one (**2c**)

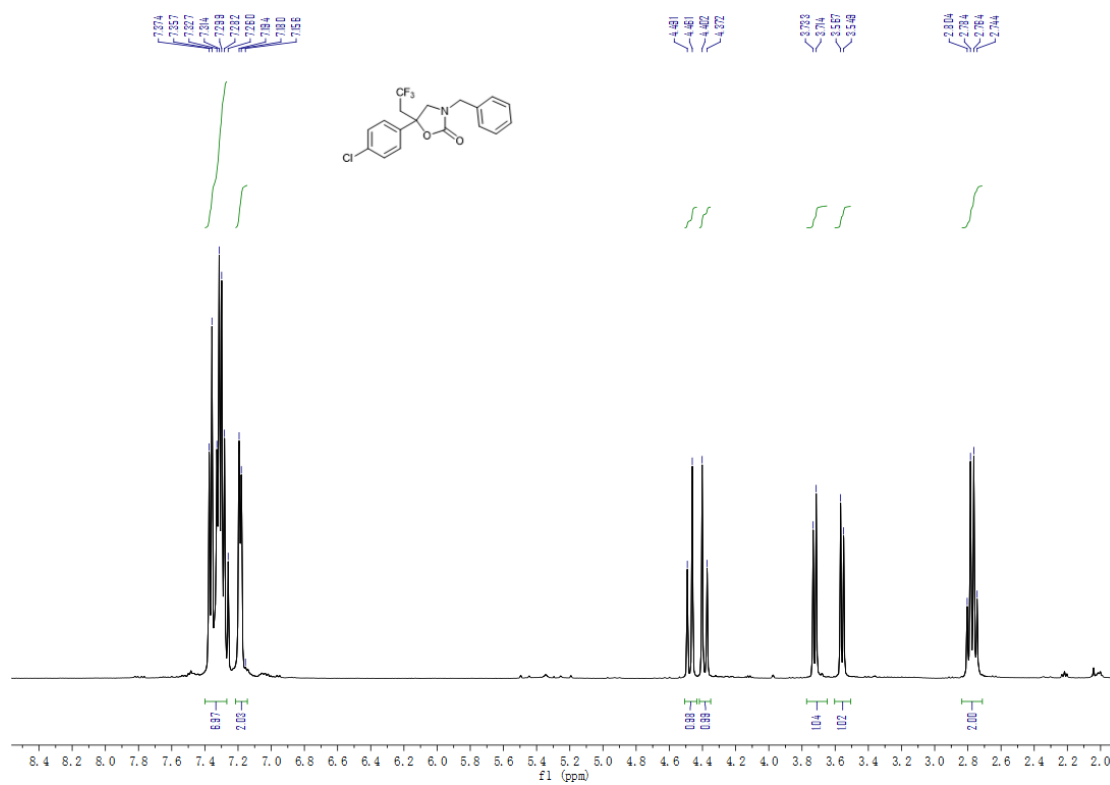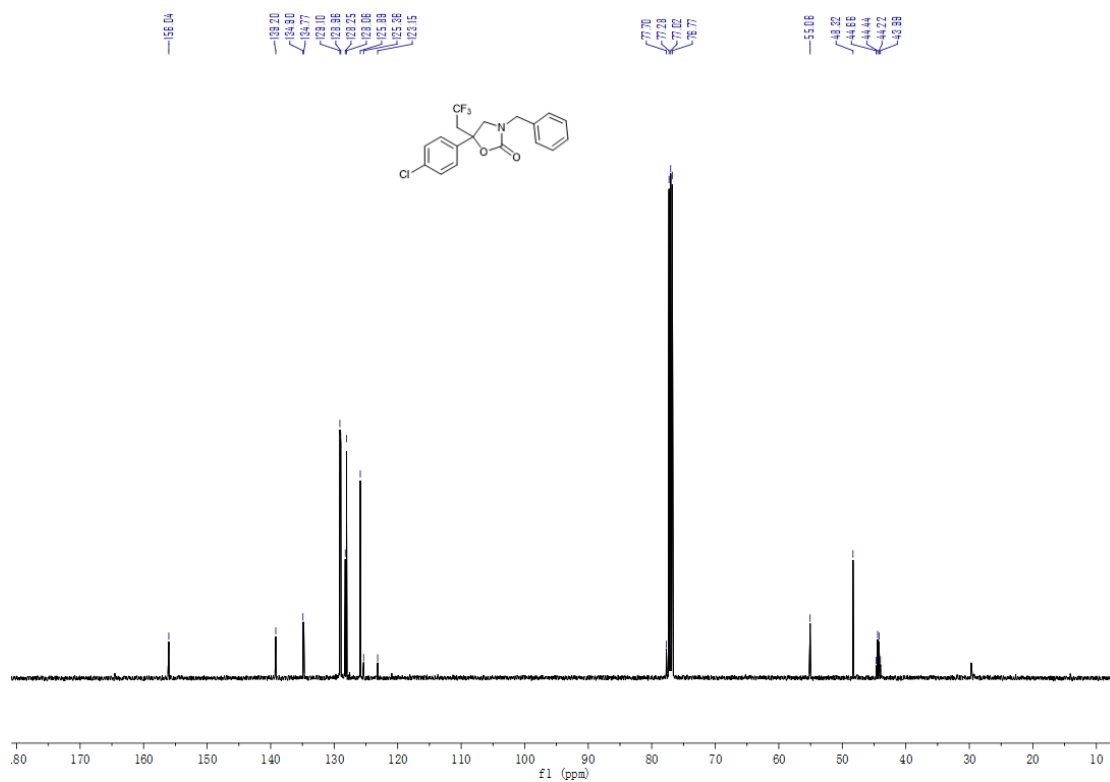

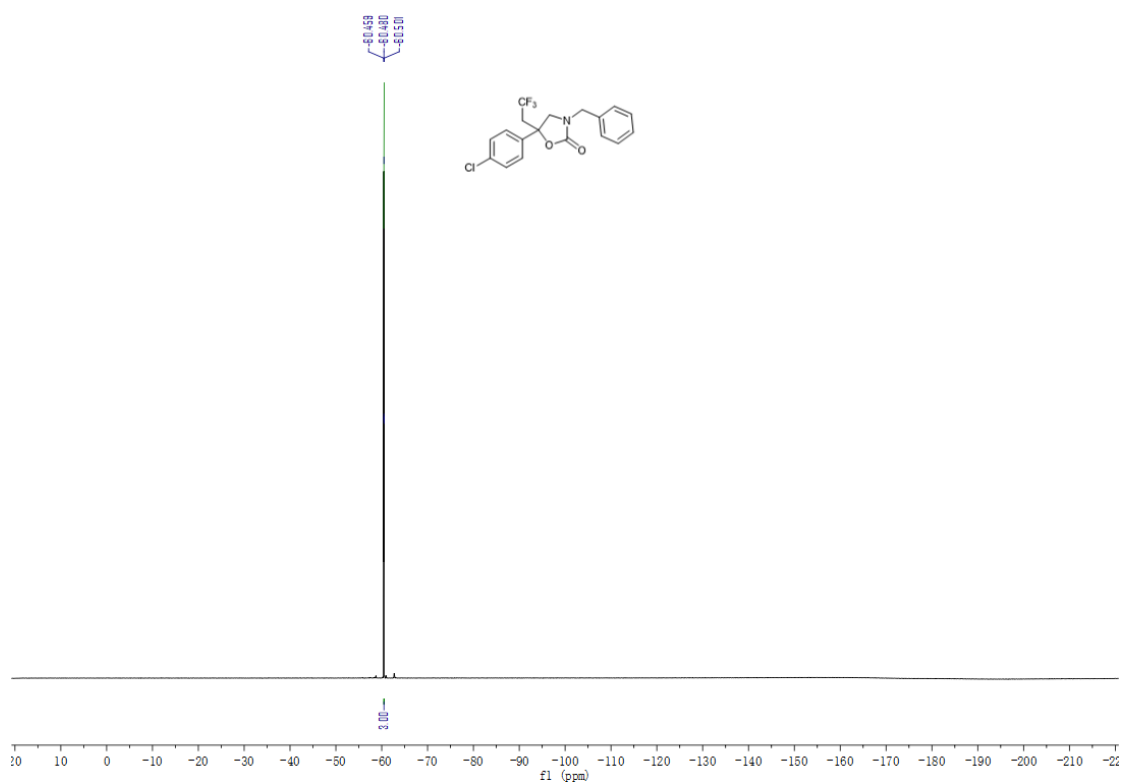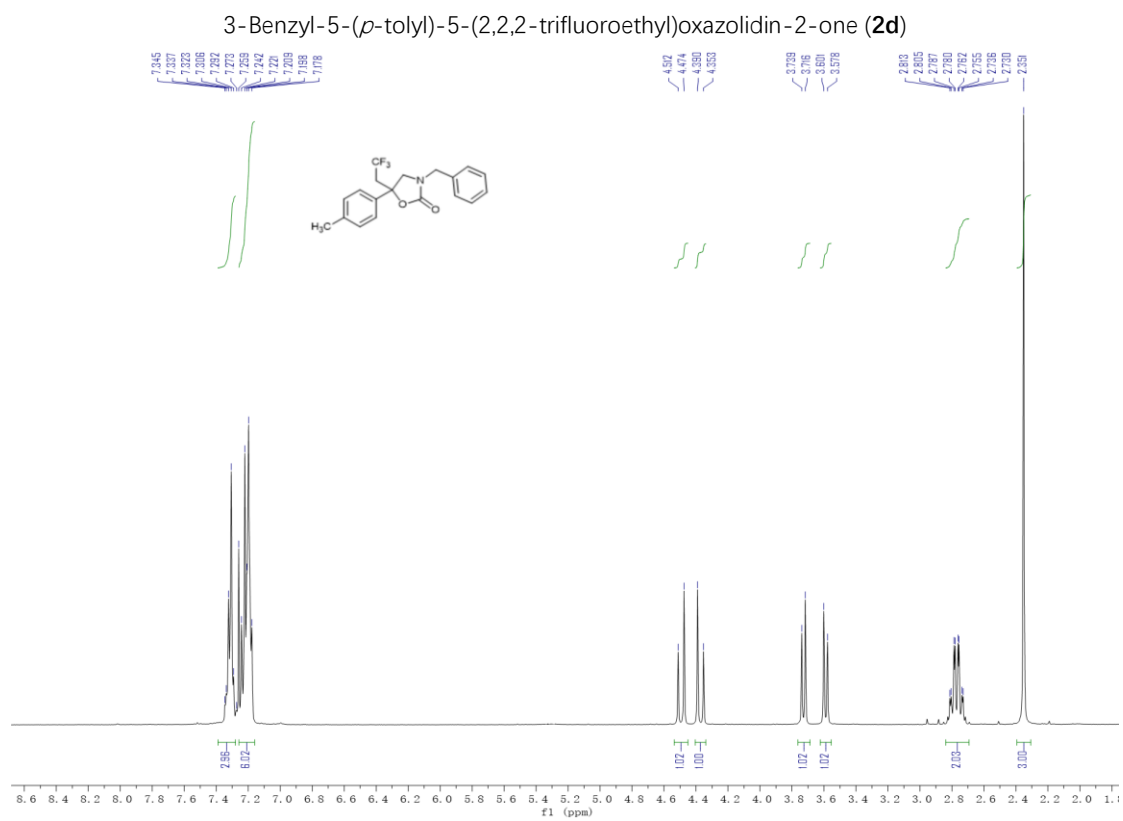

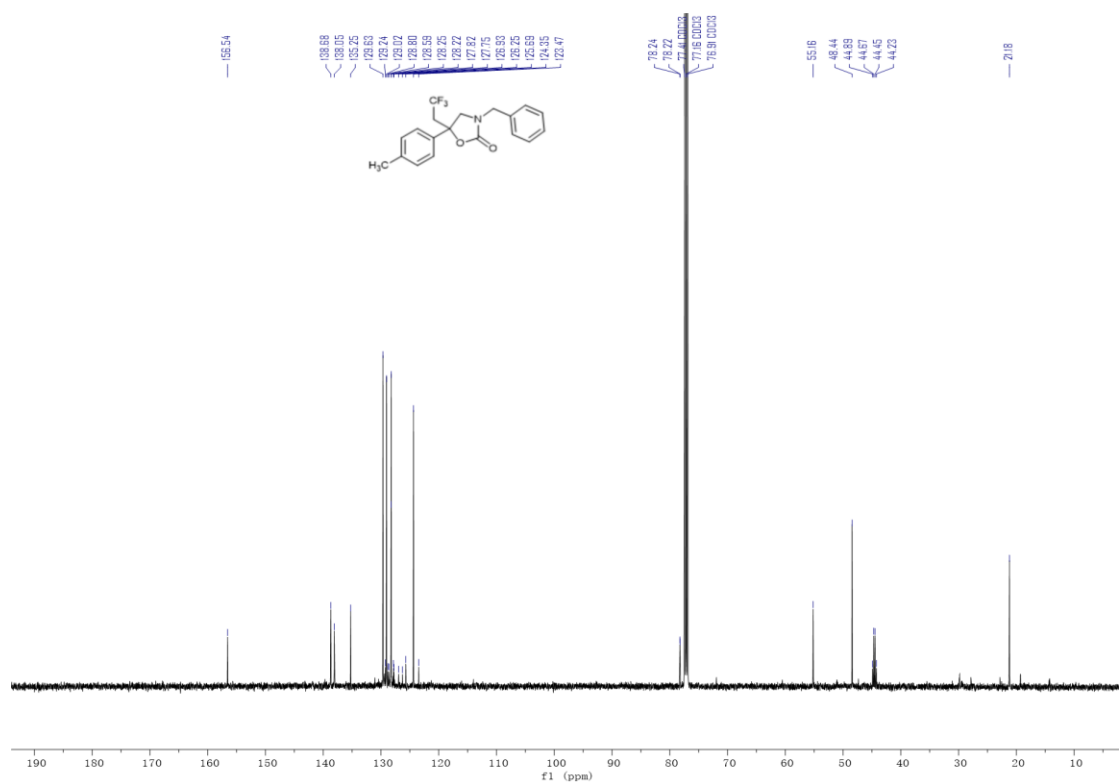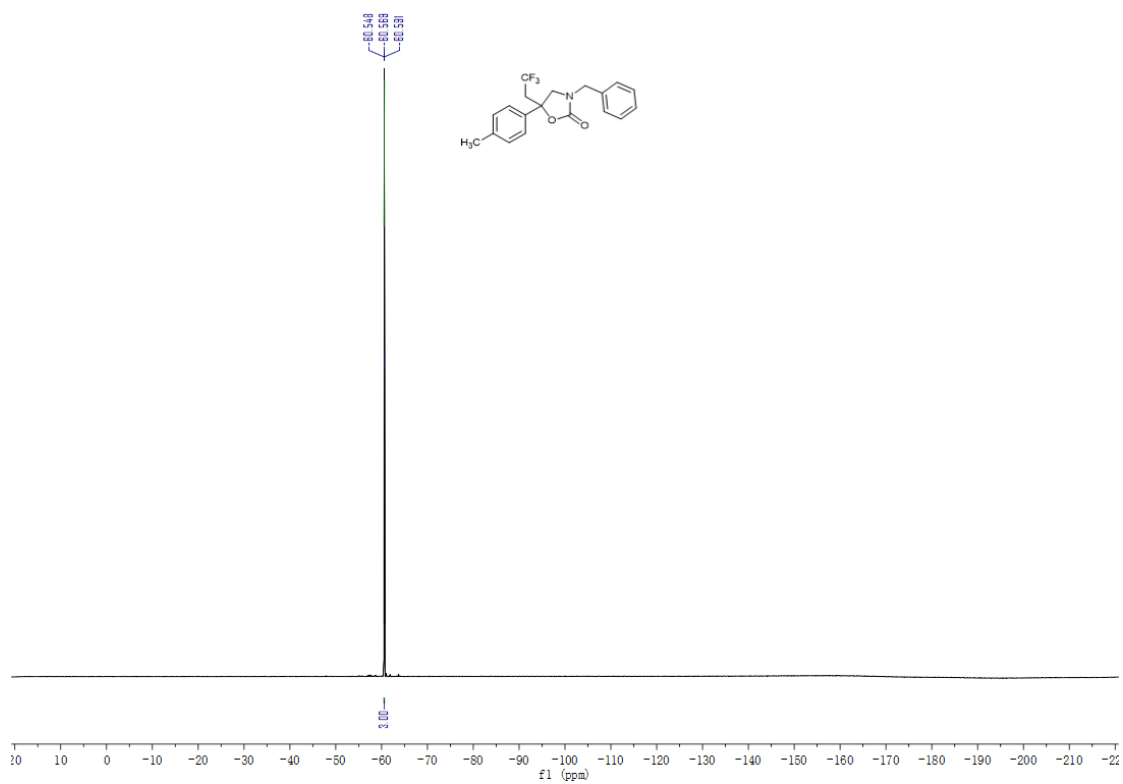

3-Benzyl-5-(naphthalen-2-yl)-5-(2,2,2-trifluoroethyl)oxazolidin-2-one (**2e**)

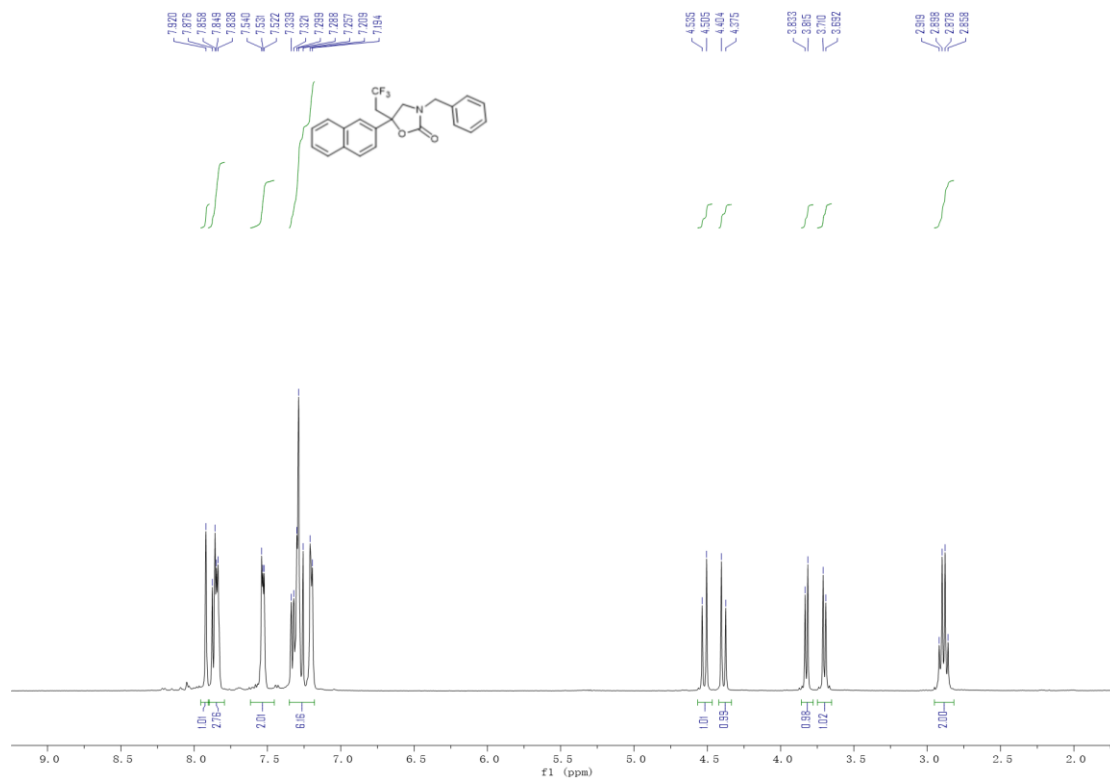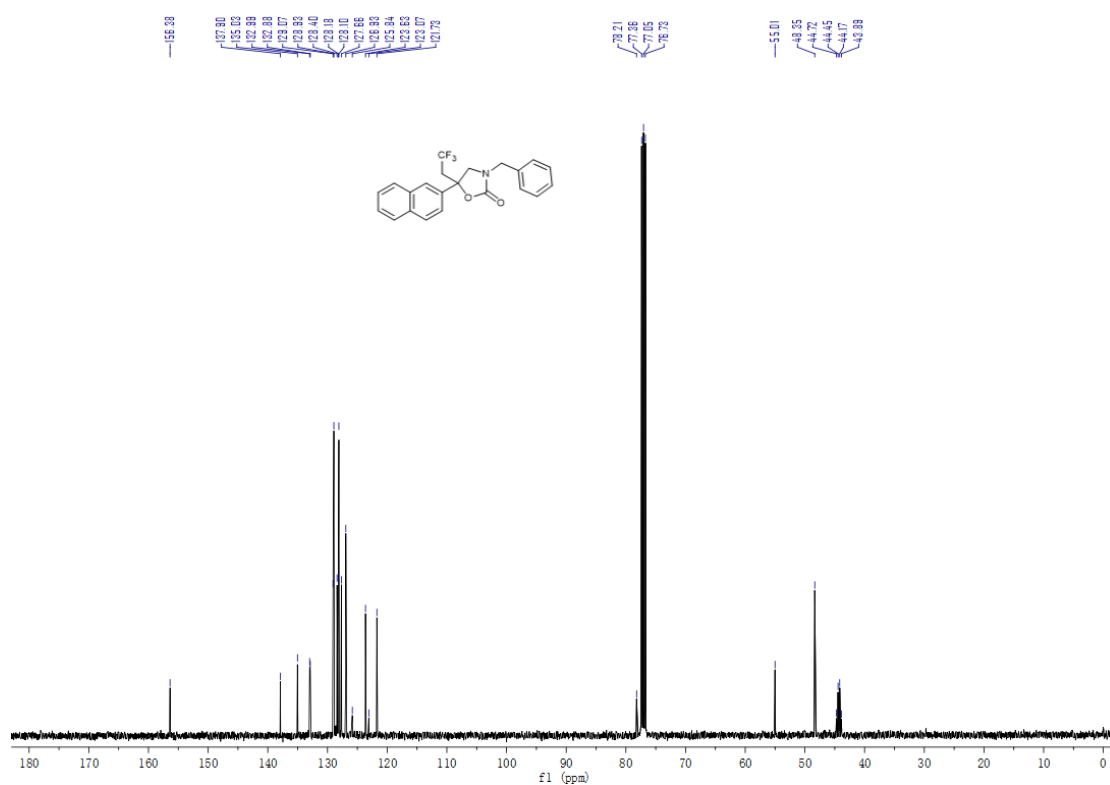

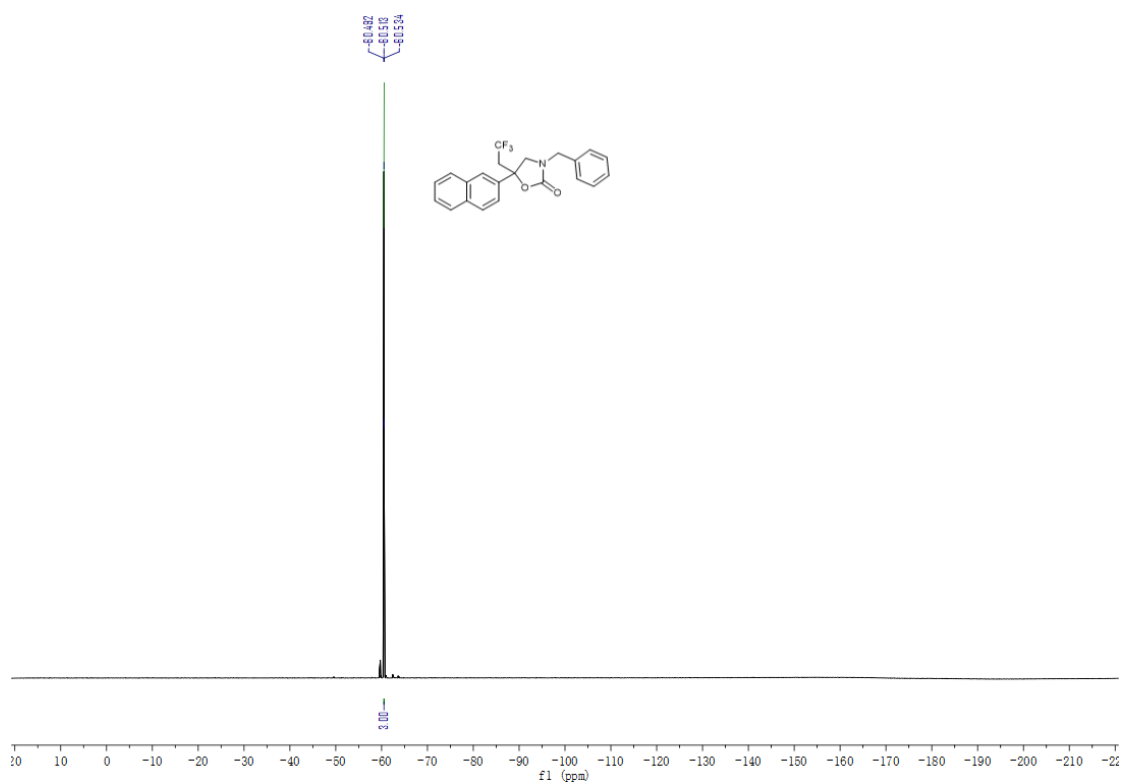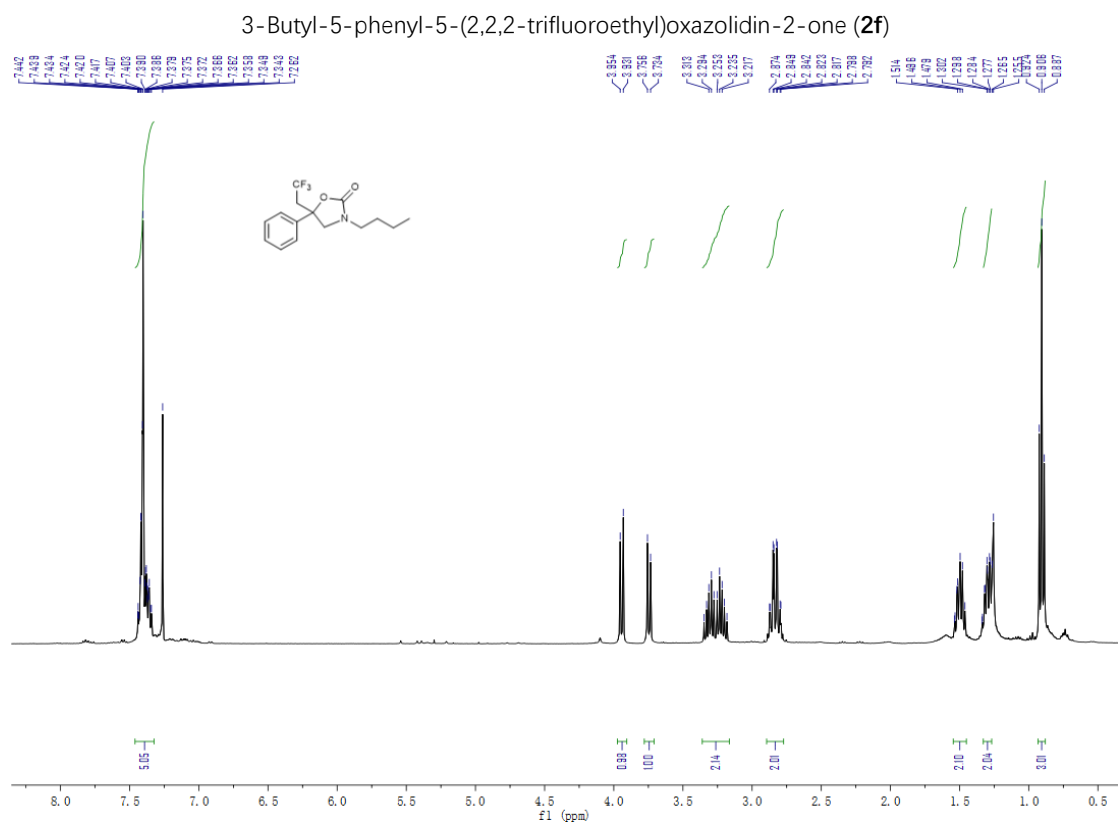

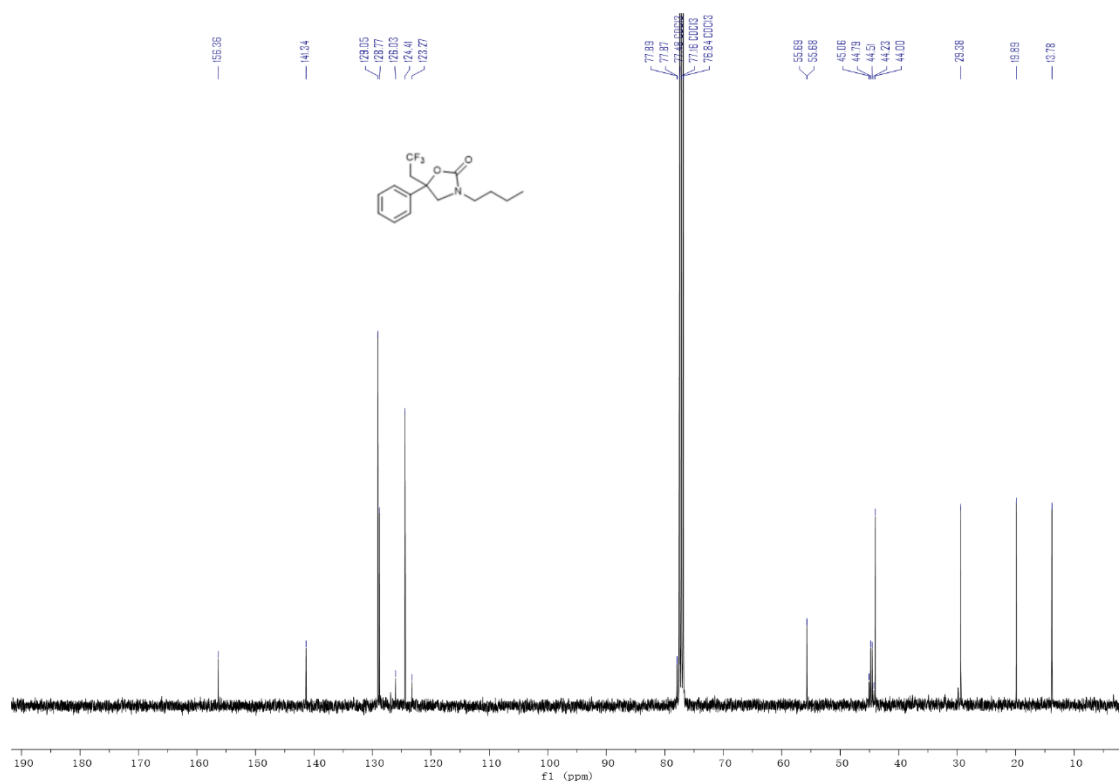

3'-Benzyl-2-(trifluoromethyl)-3,4-dihydro-2*H*-spiro[naphthalene-1,5'-oxazolidin]2'-one (**2g**)

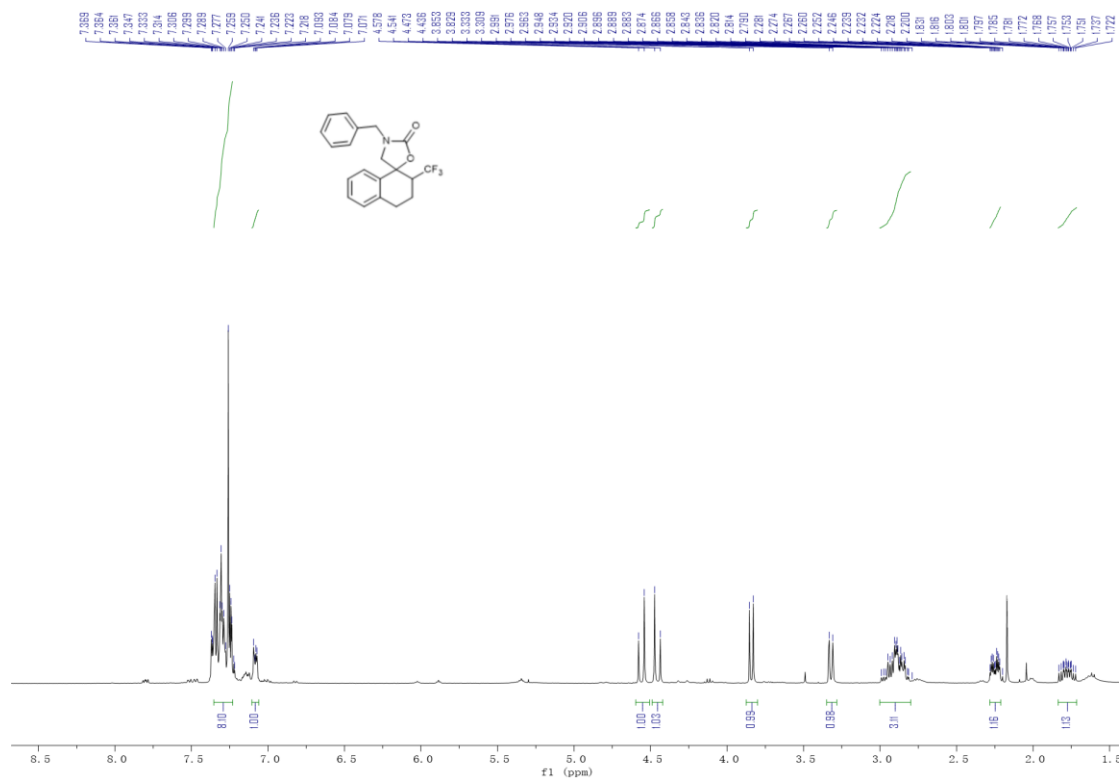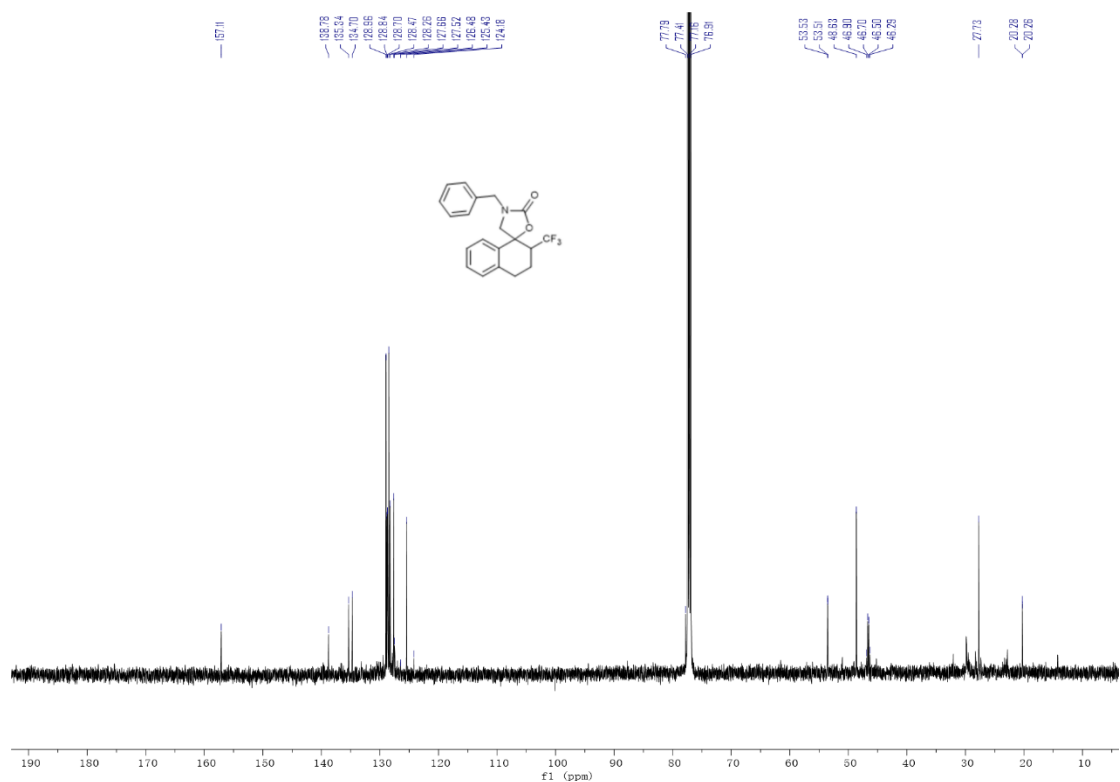

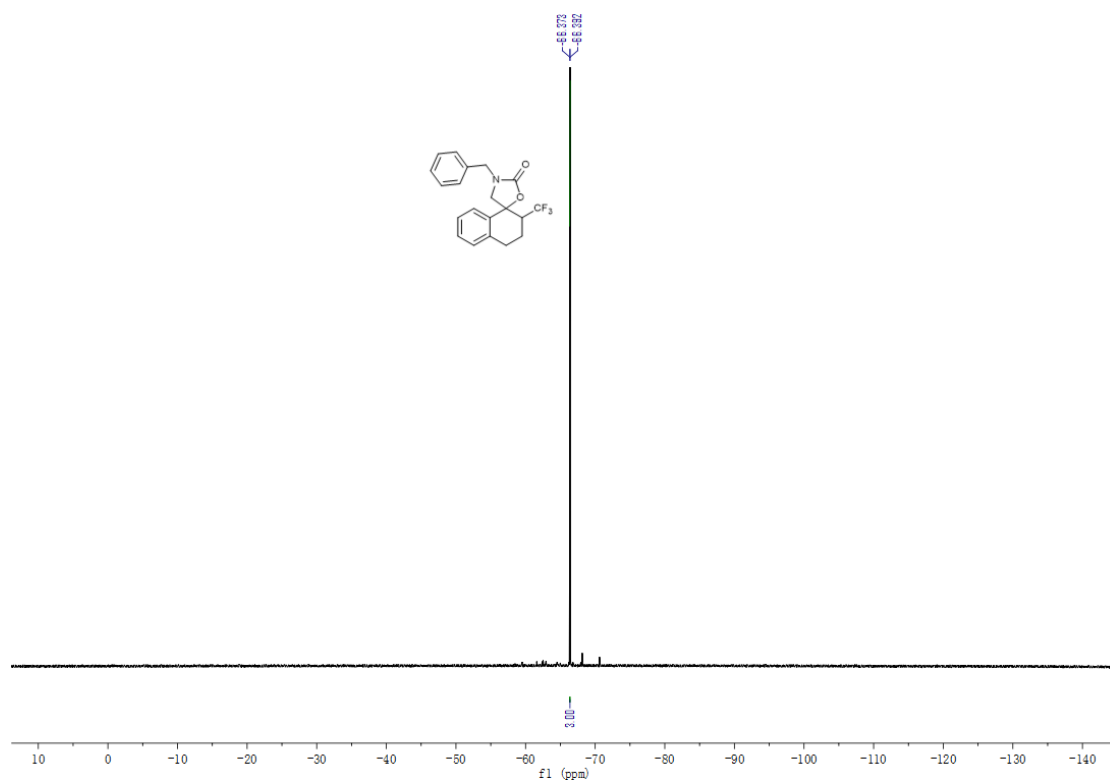

3-Benzyl-5-phenyl-5-(2,2,2-trifluoroethyl)thiazolidine-2-thione (**3a**)

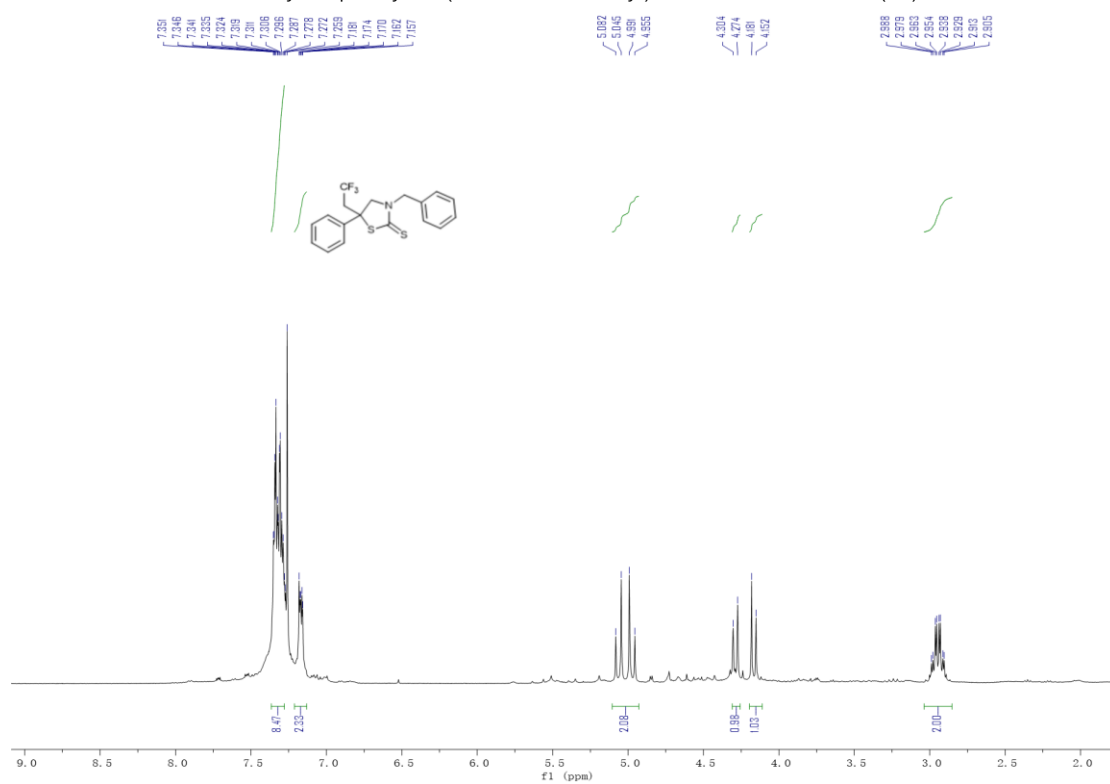

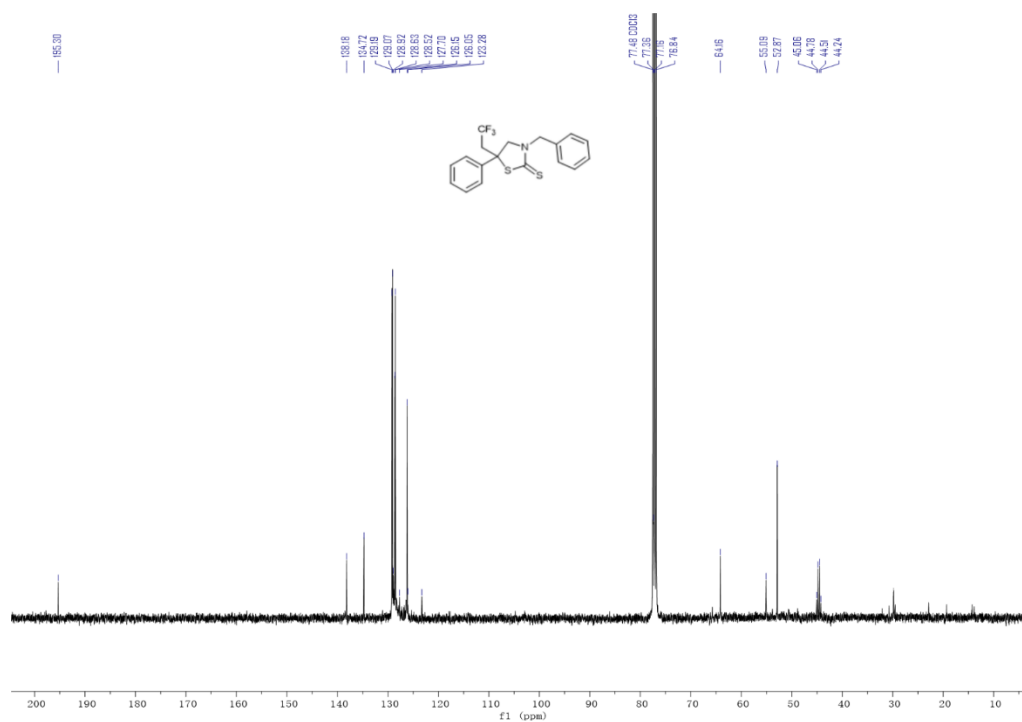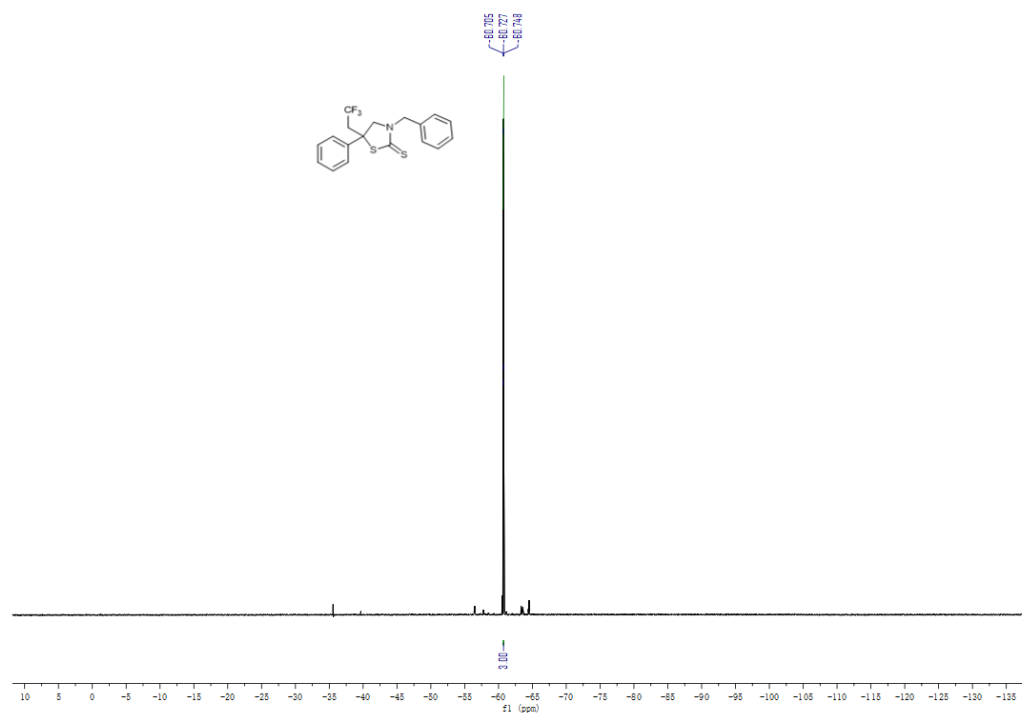

## Notes and references

- 1 X. Zhao, H. He, T. Hu, F. Dai and D. Sun, *Inorg. Chem.*, 2009, 48, 8057–8059.
- 2 B. Y. Li, Z. J. Zhang, Y. Li, K. X. Yao, Y. H. Zhu, Z. Y. Deng, F. Yang, X. J. Zhou, G. H. Li, H. H. Wu, N. Nijem, Y. J. Chabal, Z. P. Lai, Y. Han, Z. Shi, S. H. Feng and J. Li, *Angew. Chem. Int. Ed.*, 2012, 51, 1412–1415.
- 3 D. X. Ma, B. Y. Li, X. J. Zhou, Q. Zhou, K. Liu, G. Zeng, G. H. Li, Z. Shi and S. H. Feng, *Chem. Commun.*, 2013, 49, 8964–8966.
- 4 J.-H. Ye, L. Song, W.-J. Zhou, T. Ju, Z.-B. Yin, S.-S. Yan, Z. Zhang, J. Li and D.-G. Yu, *Angew. Chem. Int. Ed.*, 2016, 55, 10022–10026.
